# Supplementary material for: Endogenous Ethanol and Triglyceride Production by Gut Pichia kudriavzevii, Candida albicans and Candida glabrata Yeasts in Non-Alcoholic Steatohepatitis
Source: Cells. 2022 Oct 27;11(21):3390. doi: 10.3390/cells11213390 (PMC9654979; doi:10.3390/cells11213390)
Supplement: Supplementary file 1 [file cells-11-03390-s001.zip › Supplementary Table 1 and 3 to 7 - R2.xlsx]

## Sheet: Table S1
Supplementary Table 1. Literature review of auto-brewery syndrome (59 cases from 55 articles)
Patient_Nb	Reference	PMID	DOI or ISSN	Web address	Country	Age	Sex (Male 1)	History of fatty liver	Withdrawal alcoholism	Cirrhosis	Obesity	BMI	Diabetes	Hypertension	Hyperlipidemia	Metabolic syndrome	Short gut / bowel syndrome	Crohn	Gut medical and surgical history	Triggering event	Antibiotics-trigger	Trigger text	Complications	Abnormal liver markers	Liver echography	Liver histology	Max blood concentration (g/L)	Max breath ethanol	At least 1 microbe	Fungi	Urinary Fugi	Oral fungi	Gut fungi	Candida sp.	Candida albicans	Candida guillIermondii	Candida tropicalis	Candida parapsilosis	Candida kefyr	Candida glabrata	Candida stelloidea	Candida intermedia	Pichia kudriavzevii	Saccharomyces sp.	Saccharomyces cerevisaie	Saccharomyces boulardii	Unidentified Saccharomyces	Other fungal species	Parasite
Patient 1	Ahmed, 2018		https://doi.org/10.1093/ajcp/aqy090.004	https://academic.oup.com/ajcp/article/150/suppl_1/S2/5102930?login=false	USA	45	1				1		1			1				1	1								1	1	0		1	0										1	1
Patient 2	Akbaba, 2020	32255712	10.1080/15389588.2020.1740688	https://www.tandfonline.com/doi/abs/10.1080/15389588.2020.1740688	Turkey	38	1		1							0							Traffic accident	Normal	US: liver steatosis		3.22		NA	NA	NA		NA	NA	NA	NA	NA	NA	NA	NA	NA	NA	NA	NA	NA	NA	NA	NA
Patient 3	Akhavan, 2019	31750376	10.14309/crj.0000000000000208	https://www.ncbi.nlm.nih.gov/pmc/articles/PMC6831150/	USA	25	1		NA	NA	NA	NA	NA	NA	NA	NA	NA	NA	NA	NA	NA	NA	NA				NA	0.07%	NA	NA	NA		NA	NA	NA	NA	NA	NA	NA	NA	NA	NA	NA	NA	NA	NA	NA	NA
Patient 4	Cordell, 2013		10.4236/ijcm.2013.47054	https://www.scirp.org/html/1-2100535_33912.htm	USA	61	1				NA	NA	NA	1	1	NA	NA			1	1								1	1	0		1	0										1	1
Patient 5	Cordell, 2015 - cas 1	Not available on Pubmed	ISSN: 2332-4120	https://www.avensonline.org/wp-content/uploads/JCMCR-2332-4120-02-0013.pdf	USA	60	1		1		1	45				1													1	1	0		1	1	1								1	0
Patient 6	Cordell, 2015 - cas 2	Not available on Pubmed	ISSN: 2332-4120	https://www.avensonline.org/wp-content/uploads/JCMCR-2332-4120-02-0013.pdf	USA	42	0					NA				0													1	1	0		1	0										1	1	1
Patient 7	Cordell, 2015 - Cas 3	Not available on Pubmed	ISSN: 2332-4120	https://www.avensonline.org/wp-content/uploads/JCMCR-2332-4120-02-0013.pdf	USA	32	1					NA				0													1	0	0		0	0										0				0	Enterobius vermicularis
Patient 8	Dahshan, 2001	11568528	https://doi.org/10.1097/00005176-200108000-00024	https://journals.lww.com/jpgn/fulltext/2001/08000/auto_brewery_syndrome_in_a_child_with_short_gut.24.aspx	USA	13	0					NA				0	1		1								3.5		1	1	0		1	1						1				1	1
Patient 9	Ezaki, 1961 (Kaji, 1984)	6520589	10.1016/s0015-7368(84)72325-5		Japan	75	0									0			1										1	1	0		1	1			1							0
Patient 10	Fujisawa, 1961 (Kaji, 1984)	6520589	10.1016/s0015-7368(84)72325-5		Japan	43	1									0			1										1	1	0		1	1							1			0
Patient 11	Fukaura, 1965 (Kaji, 1984)	6520589	10.1016/s0015-7368(84)72325-5		Japan	48	1									0													1	1	0		1	1	1									0
Patient 12	Green, 2012	22418655	https://doi.org/10.1097/inf.0b013e318241590f		USA	12	0									0											3.9		1	1	0		1	1						1
Patient 13	Guo, 2018	Not available on Pubmed	SSN:1940-5901	https://cdn.knowthecause.com/wp-content/uploads/2020/05/Guo2018GtFermentationSyndrome.pdf	China	30	1									0								1 (transaminases > 4N) ALT 713 (18N), AST 368 (9N), gammaGT 256 (5N) - Bilirubin 81 (4.5N)	Mild fatty liver -	liver core needle biopsy = steatohepatitis	3.11		1	1	0		1	1				1
Patient 14	Hashimoto, 1961 (Kaji, 1984)	6520589	10.1016/s0015-7368(84)72325-5	https://www.sciencedirect.com/science/article/abs/pii/S0015736884723255	Japan	30	1									0			1										1	1	0		1	0										1			1
Patient 15	Ideuchi, 1966 (Kaji, 1984)	6520589	10.1016/s0015-7368(84)72325-5	https://www.sciencedirect.com/science/article/abs/pii/S0015736884723255	Japan	32	1									0													1	1	0		1	1	1									0
Patient 16	Ishibashi, 1963 (Kaji, 1984)	6520589	10.1016/s0015-7368(84)72325-5	https://www.sciencedirect.com/science/article/abs/pii/S0015736884723255	Japan	1	0									0			NA										1	1	0		1	0										1	1
Patient 17	Ito, 1961 (Kaji, 1984)	6520589	10.1016/s0015-7368(84)72325-5	https://www.sciencedirect.com/science/article/abs/pii/S0015736884723255	Japan	NA	NA									0			NA										1	1	0		1	1	1									0
Patient 18	Iyo, 1966 (Kaji, 1984)	5962733	10.1016/s0015-7368(84)72325-5	https://www.sciencedirect.com/science/article/abs/pii/S0015736884723255	Japan	21	0									0													1	1	0		1	1	1								1	0
Patient 19	Jansson-Nettelbladt, 2006	16720504	10.1080/08035250500501625	https://onlinelibrary.wiley.com/doi/abs/10.1111/j.1651-2227.2006.tb02271.x	Sweden	3	0					NA				0	1		1										1	1	0		1	1					1					1	1
Patient 20	Kaji, 1984 - case 1	6520589	10.1016/s0015-7368(84)72325-5	https://www.sciencedirect.com/science/article/abs/pii/S0015736884723255	Japan	24	0					NA				0							Coma				2.54		1	1	0		1	1	1								1	0
Patient 21	Kaji, 1984 - case 2	6520589	10.1016/s0015-7368(84)72325-5	https://www.sciencedirect.com/science/article/abs/pii/S0015736884723255	Japan	35	1									0													1	1	0		1	1	1									0
Patient 22	Kameya, 1963 (Kaji, 1984)	6520589	10.1016/s0015-7368(84)72325-5	https://www.sciencedirect.com/science/article/abs/pii/S0015736884723255	Japan	39	0									0			1										1	1	0		1	1	1									0
Patient 23	Kanaya, 1978 (Kaji, 1984)	6520589	10.1016/s0015-7368(84)72325-5	https://www.sciencedirect.com/science/article/abs/pii/S0015736884723255	Japan	40	0									0													1	1	0		1	1	1									0
Patient 24	Kawabata, 1963 (Kaji, 1984)	6520589	10.1016/s0015-7368(84)72325-5	https://www.sciencedirect.com/science/article/abs/pii/S0015736884723255	Japan	45	1									0			1										1	1	0		1	1		1								0
Patient 25	Kawanaka, 1978 (Kaji, 1984)	6520589	10.1016/s0015-7368(84)72325-5	https://www.sciencedirect.com/science/article/abs/pii/S0015736884723255	Japan	2	0									0													1	1	0		1	1						1				0
Patient 26	Kikuoka, 1961 (Kaji, 1984)	6520589	10.1016/s0015-7368(84)72325-5	https://www.sciencedirect.com/science/article/abs/pii/S0015736884723255	Japan	37	1									0			1										1	1			1	1	1									0				Brown yeast
Patient 27	Kruckenberg, 2020	32092761	10.7326/L19-0661	https://www.acpjournals.org/doi/10.7326/L19-0661	USA	61	0			1		NA	1			1													1	1	1		0	1						1				0
Patient 28	Kunishima, 1964 (Kaji, 1984)	6520589	10.1016/s0015-7368(84)72325-5	https://www.sciencedirect.com/science/article/abs/pii/S0015736884723255	Japan	28	0									0			1										1	1	0		1	1	1									0
Patient 29	Maeda, 1962 (Kaji, 1984)	6520589	10.1016/s0015-7368(84)72325-5	https://www.sciencedirect.com/science/article/abs/pii/S0015736884723255	Japan	51	1									0			1										1	1	0		1	1			1							0
Patient 30	Makunai, 1964 (Kaji, 1984)	6520589	10.1016/s0015-7368(84)72325-5	https://www.sciencedirect.com/science/article/abs/pii/S0015736884723255	Japan	3	0									0			1										NA	NA			NA	NA										NA
Patient 31	Malik, 2019	31423320	10.1136/bmjgast-2019-000325	https://bmjopengastro.bmj.com/content/6/1/e000325.long	USA	46	1				1	30				1				1	1	Cephalexin 250mg 3/d 3 weeks	Fall that caused intracranial bleeding				4		1	1	0		1	1	1			1						1	1	1
Patient 32	Mihara, 1968 (Kaji, 1984)	6520589	10.1016/s0015-7368(84)72325-5	https://www.sciencedirect.com/science/article/abs/pii/S0015736884723255	Japan	46	1									0													1	1	0		1	1			1							0
Patient 33	Mishra, 2017			https://journals.lww.com/ajg/Fulltext/2017/10001/Suspected_Gut_Fermentation_Syndrome__Auto_Brewery.2520.aspx	USA	45	1				1		1			1											0.64		0	0	0		0	0	0	0	0	0	0	0	0	0	0	0	0	0	0	0
Patient 34	Miura, 1969 (Kaji, 1984)	6520589	10.1016/s0015-7368(84)72325-5	https://www.sciencedirect.com/science/article/abs/pii/S0015736884723255	Japan	64	1									0													1	1	0		1	0										1			1
Patient 35	Miyaishi, 1960 (Kaji, 1984)	6520589	10.1016/s0015-7368(84)72325-5	https://www.sciencedirect.com/science/article/abs/pii/S0015736884723255	Japan	28	0									0			1										1	1	0		1	1	1									0
Patient 36	Muramoto, 1960 (Kaji, 1984)	6520589	10.1016/s0015-7368(84)72325-5	https://www.sciencedirect.com/science/article/abs/pii/S0015736884723255	Japan	21	1									0			1										1	1			1	1	1									0
Patient 37	Nagai, 1966 (Kaji, 1984)	6520589	10.1016/s0015-7368(84)72325-5	https://www.sciencedirect.com/science/article/abs/pii/S0015736884723255	Japan	27	1									0													1	1	0		1	1			1							0
Patient 38	Noborisaka, 1967 (Kaji, 1984)	6520589	10.1016/s0015-7368(84)72325-5	https://www.sciencedirect.com/science/article/abs/pii/S0015736884723255	Japan	19	0									0													1	1	0		1	1			1							0
Patient 39	Sakakiyama, 1971 (Kaji, 1984)	6520589	10.1016/s0015-7368(84)72325-5	https://www.sciencedirect.com/science/article/abs/pii/S0015736884723255	Japan	68	0									0													1	1	0		1	0										1			1
Patient 40	Sato, 1952 (Kaji, 1984)	6520589	10.1016/s0015-7368(84)72325-5	https://www.sciencedirect.com/science/article/abs/pii/S0015736884723255	Japan	46	1									0			1										1	1	0		1	1										0
Patient 41	Saverimuttu, 2019	31777691	10.7759/cureus.5904	https://www.ncbi.nlm.nih.gov/pmc/articles/PMC6853272/	USA	45	1				1	35	1		1	1	0			1	1		Seizures, pancreatitis				4.1		1	1	0		1	1								1		1	1
Patient 42	Shy, 1980 (Kaji, 1984)	6520589	10.1016/s0015-7368(84)72325-5	https://www.sciencedirect.com/science/article/abs/pii/S0015736884723255	Japan	70	1									0													1	1	0		1	1			1							0
Patient 43	Spinucci, 2006	16772842	10.1097/01.meg.0000223906.55245.61	https://journals.lww.com/eurojgh/Abstract/2006/07000/Endogenous_ethanol_production_in_a_patient_with.19.aspx	Italy	44	1					16 (cachexia)				0			1	1	1	Amoxicillin clavulanate, sugar rich diet	Confusion		Liver ultrasound : hepatosteatosis		1.15		1	1	0		1	1	1									1	1
Patient 44	Tajima, 1969 (Kaji, 1984)	6520589	10.1016/s0015-7368(84)72325-5	https://www.sciencedirect.com/science/article/abs/pii/S0015736884723255	Japan	52	0									0													1	1	0		1	1	1						1			1			1
Patient 45	Takahashi, 1971 (Kaji, 1984)	6520589	10.1016/s0015-7368(84)72325-5	https://www.sciencedirect.com/science/article/abs/pii/S0015736884723255	Japan	36	1									0													1	1	0		1	1	1									0
Patient 46	Takahashi, 1980 (Kaji, 1984)	6520589	10.1016/s0015-7368(84)72325-5	https://www.sciencedirect.com/science/article/abs/pii/S0015736884723255	Japan	70	1									0													1	1	0		1	1						1				0
Patient 47	Takahashi, 2021	33976897	10.1002/ams2.652	https://onlinelibrary.wiley.com/doi/full/10.1002/ams2.652	Japan	60	1	1			0	21.7				1							Car accident, seizures				3		1	1	0	1	1	1	1
Patient 48	Takasugi, 1960 - case 1 (Kaji, 1984)	6520589	10.1016/s0015-7368(84)72325-5	https://www.sciencedirect.com/science/article/abs/pii/S0015736884723255	Japan	46	1									0			1										1	1	0		1	1	1									0
Patient 49	Takasugi, 1960 - case 2 (Kaji, 1984)	6520589	10.1016/s0015-7368(84)72325-5	https://www.sciencedirect.com/science/article/abs/pii/S0015736884723255	Japan	41	1									0			1										1	1	0		1	1	1									0
Patient 50	Tanaka, 1961 (Kaji, 1984)	6520589	10.1016/s0015-7368(84)72325-5	https://www.sciencedirect.com/science/article/abs/pii/S0015736884723255	Japan	61	1									0			1										1	1	0		1	1	1									0
Patient 51	Tanaka, 1967 (Kaji, 1984)	5586788	10.1016/s0015-7368(84)72325-5	https://www.sciencedirect.com/science/article/abs/pii/S0015736884723255	Japan	22	1									0													1	1	0		1	1	1									0
Patient 52	Tsukahara, 1964 (Kaji, 1984)	6520589	10.1016/s0015-7368(84)72325-5	https://www.sciencedirect.com/science/article/abs/pii/S0015736884723255	Japan	15	1									0			1										1	1	0		1	1	1									0
Patient 53	Vandekerckhove, 2020	32805128	10.7326/L20-0341	https://www.acpjournals.org/doi/10.7326/L20-0341?url_ver=Z39.88-2003&rfr_id=ori:rid:crossref.org&rfr_dat=cr_pub%20%200pubmed	Belgium	47	1									0			1	1	Amoxicillin-clavulanic acid / moxifloxacin			1	Liver US: moderate steatosis				1	1	0		1	1	0	0	0	0	0	1	0	0	0	0
Patient 54	Wakana, 1969 (Kaji, 1984)	6520589	10.1016/s0015-7368(84)72325-5	https://www.sciencedirect.com/science/article/abs/pii/S0015736884723255	Japan	48	1									0													1	1	0		1	1	1									0
Patient 55	Welch, 2016	27161390	10.1093/ecco-jcc/jjw098	https://academic.oup.com/ecco-jcc/article/10/12/1448/2706997?login=false	USA	71	1									0	1	1	1				Massive small bowel dilation				2.34		1	1	0		1	1						1				0
Patient 56	Yamashita, 1974 (Kaji, 1984)	4362761	10.1016/s0015-7368(84)72325-5	https://www.sciencedirect.com/science/article/abs/pii/S0015736884723255	Japan	53	1									0													1	1	0		1	0										0
Patient 57	Yokota, 1965 (Kaji, 1984)	6520589	10.1016/s0015-7368(84)72325-5	https://www.sciencedirect.com/science/article/abs/pii/S0015736884723255	Japan	20	0									0													1	1	0		1	1	1									0
Patient 58	Yoshikawa, 1963 (Kaji, 1984)	6520589	10.1016/s0015-7368(84)72325-5	https://www.sciencedirect.com/science/article/abs/pii/S0015736884723255	Japan	28	0									0			NA										1	1	0		1	1	1									0
Patient 59	Yuan, 2019	31543403	10.1016/j.cmet.2019.08.018	https://www.cell.com/cell-metabolism/fulltext/S1550-4131(19)30447-4?_returnURL=https%3A%2F%2Flinkinghub.elsevier.com%2Fretrieve%2Fpii%2FS1550413119304474%3Fshowall%3Dtrue	China	NA	1									0								1		Percutaneous liver biopsy, however, showed that there were increases in a number of fatty droplets, infiltration of inflammatory cells and deposition of collagens in the liver, suggesting that the patient had liver fibrosis and NASH	4		1	0			0	0	0
[truncated: 12 more columns]

## Sheet: Table S3
Supplementary Table 3. Fecal ethanol measurements
Individuals	Age	Gender	Clinical status	Fecal ethanol (mM)	Fecal ethanol (g/L)
N1	56	M	NASH	1.04	0.04784
N2	67	M	NASH	0.5	0.023
N3	64	M	NASH	25.2	1.1592
N4	81	M	NASH	22.59	1.03914
N5	68	F	NASH	48.89	2.24894
N6	90	F	NASH	4.06	0.18676
N7	62	F	NASH	50.38	2.31748
N8	72	F	NASH	0.8	0.0368
N9	63	F	NASH	1.4	0.0644
N10	60	M	NASH	1.12	0.05152
T1	24	M	Healthy control	22	1.012
T2	26	M	Healthy control	0.8	0.0368
T3	38	M	Healthy control	23.94	1.10124
T4	30	F	Healthy control	0.75	0.0345
T5	27	M	Healthy control	9.25	0.4255
T6	31	M	Healthy control	0.75	0.0345
T7	44	F	Healthy control	0	0
T8	27	F	Healthy control	0.25	0.0115
T9	24	F	Healthy control	0.4	0.0184
T10	39	M	Healthy control	0	0
M: Male, F: Female, NASH: Non-alcoholic steatohepatitis
Molar mass of ethanol: 46.07 g/mol

## Sheet: Table S4
Supplementary Table 4. Results of fungal and Gram-negative bacterial culture
		Yeasts (Sabouraud, Chromoagar and fast-fung media)						Gram-negative bacteria (Culture on Mac Conkey broth and agar)
ID	NASH	Candida glabrata	Pichia kudriavzevii	Candida albicans	Galactomyces geotrichum	Any yeast	Total yeasts	Citrobacter amolonaticus	Citrobacter braaki	Citrobacter farmeri	Citrobacter freundii	Citrobacter Koseri	Citrobacter sedlakii	Citrobacter youngae	Enterobacter cloacea	Escherichia coli	Hafnia alvei	Klebsiella oxytoca	Klebsiella pneumoniae	Proteus mirabilis	Pseudomonas aeruginosa	Raoultella planticola	Total Gram-negative bacteria
N1	1	1	0	0	0	1	1	0	1	0	1	0	0	0	1	1	0	0	0	0	0	0	4
N2	1	0	1	0	0	1	1	0	0	0	0	0	0	0	0	1	0	0	0	0	1	0	2
N3	1	0	1	0	0	1	1	1	0	1	1	0	1	0	1	1	1	0	1	0	0	0	8
N4	1	0	0	1	0	1	1	0	0	1	0	0	0	0	0	1	0	0	0	0	0	0	2
N5	1	0	1	0	0	1	1	0	0	0	0	0	0	0	0	1	0	0	0	1	0	0	2
N6	1	0	0	1	0	1	1	0	0	0	0	0	0	0	1	1	0	0	1	0	0	1	4
N7	1	1	0	0	1	1	2	0	0	0	0	0	0	0	0	1	1	1	0	0	0	0	3
N8	1	0	1	0	0	1	1	0	0	0	0	0	0	0	0	0	0	0	0	0	0	0	0
N9	1	0	0	0	1	1	1	0	0	0	0	0	0	0	0	1	0	0	0	0	0	0	1
N10	1	0	0	0	0	0	0	0	0	0	0	0	0	1	0	1	0	0	0	0	0	0	2	Number of different Gram-negative species
TOTAL NASH		2	4	2	2	9	10	1	1	2	2	0	1	1	3	9	2	1	2	1	1	1	28	14
T1	0	0	0	0	0	0	0	0	0	0	1	0	0	1	0	1	0	0	0	0	0	0	3
T2	0	0	0	0	0	0	0	0	0	0	0	0	0	0	0	1	0	0	1	0	0	0	2
T3	0	0	0	0	0	0	0	0	0	0	0	0	0	0	0	1	0	0	0	0	0	0	1
T4	0	0	0	0	0	0	0	0	0	0	0	1	0	0	0	1	0	0	0	0	0	0	2
T5	0	0	0	0	0	0	0	0	0	0	0	0	0	0	1	1	0	0	0	0	0	0	2
T6	0	0	0	0	0	0	0	0	0	0	0	0	0	0	0	1	0	0	0	0	0	0	1
T7	0	0	0	0	0	0	0	0	0	0	0	0	0	0	0	1	0	0	0	0	0	0	1
T8	0	0	0	0	0	0	0	0	0	0	0	0	0	0	0	1	0	0	1	0	0	0	2
T9	0	0	0	0	0	0	0	0	0	0	1	0	0	0	0	1	0	0	0	0	0	0	2
T10	0	0	0	0	0	0	0	0	0	0	0	0	0	0	1	1	0	0	0	0	0	0	2	Number of different Gram-negative species
TOTAL CONTROLS		0	0	0	0	0	0	0	0	0	2	1	0	1	2	10	0	0	2	0	0	0	18	6
Total		2	4	2	2	9	10	1	1	2	4	1	1	2	5	19	2	1	4	1	1	1	46
NASH: Non-alcoholic steatohepatitis

## Sheet: Table S5
Supplementary Table 5. Ethanol production of yeasts
Ethanol (g/L) produced in	Sabouraud Medium	10% D-fructose medium
Candida_albicans_N4	6.10335	0.931771
Candida_albicans_N6	0.156177	0.690662
Candida_glabrata_N1	3.52067	0.780032
Candida_glabrata_N7	4.60654	1.35081
Pichia_kudriavzevii _N2	6.31528	1.3902
Pichia_kudriavzevii _N3	5.93981	2.33351
Pichia_kudriavzevii _N5	3.20693	1.47803
Pichia_kudriavzevii _N8	1.3973	1.3578
Galactomyces_geotrichum_N7	0.189808	0.172618
Galactomyces_geotrichum_N9	0.0248778	NAa
N: Non-alcoholic steatohepatis. No yeast was isolated from healthy controls. aThis strain was lost, and did not cultivate again despite several attempts, before the fructose experiment.

## Sheet: Table S6
Supplementary Table 6. Ethanol production of Gram-negative bacterial strains
Strain	Clinical status	Ethanol (g/L)	Ethanol (mM)	Hi or Low-ethanol producer
Klebsiella_pneumoniae_N7	NASH	1.09416	23.75	High ethanol producer
Klebsiella_pneumoniae_N6	NASH	0.895601	19.44	High ethanol producer
Escherichia_coli_N7	NASH	0.532569	11.56	High ethanol producer
Escherichia_coli_N2	NASH	0.497095	10.79	High ethanol producer
Hafnia_alvei_N7	NASH	0.462082	10.03	High ethanol producer
Escherichia_coli_T3	Healthy control	0.457936	9.94	High ethanol producer
Escherichia_coli_T5	Healthy control	0.438126	9.51	High ethanol producer
Escherichia_coli_T4	Healthy control	0.413248	8.97	High ethanol producer
Escherichia_coli_N2	NASH	0.402652	8.74	High ethanol producer
Escherichia_coli_N3	NASH	0.402652	8.74	High ethanol producer
Escherichia_coli_T1	Healthy control	0.393899	8.55	High ethanol producer
Escherichia_coli_N1	NASH	0.365335	7.93	High ethanol producer
Escherichia_coli_T2	Healthy control	0.343222	7.45	High ethanol producer
Escherichia_coli_N4	NASH	0.3423	7.43	High ethanol producer
Escherichia_coli_T9	Healthy control	0.332625	7.22	High ethanol producer
Escherichia_coli_N5	NASH	0.331243	7.19	High ethanol producer
Klebsiella_pneumoniae_N3	NASH	0.326636	7.09	High ethanol producer
Klebsiella_pneumoniae_T7	Healthy control	0.290702	6.31	High ethanol producer
klebsiella_oxytoca_N7	NASH	0.205012	4.45	High ethanol producer
Raoutella_planticola_N6	NASH	0.0741727	1.61	Low ethanol producer
Escherichia_coli_T2	Healthy control	0.0502163	1.09	Low ethanol producer
Klebsiella_pneumoniae_T2	Healthy control	0.0451486	0.98	Low ethanol producer
Enterobacter_cloacae_T10	Healthy control	0.0446879	0.97	Low ethanol producer
Citrobacter_freundii_T1	Healthy control	0.0340918	0.74	Low ethanol producer
Citrobacter_Koseri_T4	Healthy control	0.0340918	0.74	Low ethanol producer
Escherichia_coli_T10	Healthy control	0.0336311	0.73	Low ethanol producer
Enterobacter_cloacae_T5	Healthy control	0.0294848	0.64	Low ethanol producer
Citrobacter_freundii_T10	Healthy control	0.0239564	0.52	Low ethanol producer
Citrobacter_freundii_N3	NASH	0.0124389	0.27	Low ethanol producer
Enterobacter_cloacae_N6	NASH	0.0096747	0.21	Low ethanol producer
Proteus_mirabilis_N5	NASH	0.0087533	0.19	Low ethanol producer
Hafnia_alvei_N3	NASH	0.0082926	0.18	Low ethanol producer
Citrobacter_farmeri_N3	NASH	0.0073712	0.16	Low ethanol producer
Enterobacter_cloacae_N1	NASH	0.0073712	0.16	Low ethanol producer
Enterobacter_cloacae_N3	NASH	0.0073712	0.16	Low ethanol producer
Pseudomonas_aeruginosa_N2	NASH	0.0073712	0.16	Low ethanol producer
N: NASH, T; Healthy control
Molar mass of ethanol: 46.07 g/mol
High ethanol producers : > 0.2 g/L

## Sheet: Table S7
Supplementary Table 7. Triglyceride production by Yeast strains from NASH patients
NASH Patients	Triglycerides (mmol/L)	Corrected value* (mmol/L)
Pichia_kudriavzevii_N3	3.93	3.894
Pichia_kudriavzevii_N5	2.65	2.614
Pichia_kudriavzevii_N8	2.54	2.504
Pichia_kudriavzevii_N2	2.45	2.414
Candida_Glabrata_N8	1.5	1.464
Candida_albicans_IHU	1.26	1.224
Candida-glabrata_N1	1.07	1.034
Candida_albicans_N4	0.77	0.734
Candida _albicans_N6	0.64	0.604
Galactomyces_geotrichum_N7	0.05	0.014
Fructose medium without yeast (10% fructose)	0.045	0.009
Galactomyces_geotrichum_N9	0.04	0.004
Ultrapure water	0.036
Candida_albicans_IHU: This strain was isolated from our routine diagnostic lab and was used as a control. *A value of 0.036 mmol/L was measured for ultrapure water and considered the background value. The corrected values took into account this background value.
